# Supplementary material for: Epitaxial growth of ZrSe2nanosheets on sapphireviachemical vapor deposition for optoelectronic application
Source: Royal Society of Chemistry journal article supplement (doi:10.1039/d1tc03339e), 2021-01-01
Supplement: d1tc03339e1.pdf [file d1tc03339e1.pdf]

## Electronic Supplementary Information

### **Epitaxial growth of ZrSe<sub>2</sub> nanosheets on sapphire by chemical vapor deposition for optoelectronic application**

Yan Tian,<sup>a</sup> Maoyuan Zheng,<sup>a,c</sup> Yong Cheng,<sup>a</sup> Zhigang Yin,<sup>a</sup> Ji Jiang,<sup>a</sup> Gaokai Wang,<sup>a</sup> Jingren Chen,<sup>a</sup> Xingxing Li,<sup>b</sup> Jing Qi<sup>c</sup> and Xingwang Zhang<sup>\*a,b</sup>

<sup>a</sup> Key Lab of Semiconductor Materials Science, Institute of Semiconductors, Chinese Academy of Sciences, Beijing 100083, & Center of Materials Science and Optoelectronics Engineering, University of Chinese Academy of Sciences, Beijing 100049, P. R. China

<sup>b</sup> Joint Lab of Digital Optical Chip, Wuyi University, Jiangmen 529020, P. R. China

<sup>c</sup> School of Physical Science and Technology, Lanzhou University, Lanzhou 730000, P. R. China

\* Corresponding author. E-mail: [xwzhang@semi.ac.cn](mailto:xwzhang@semi.ac.cn)

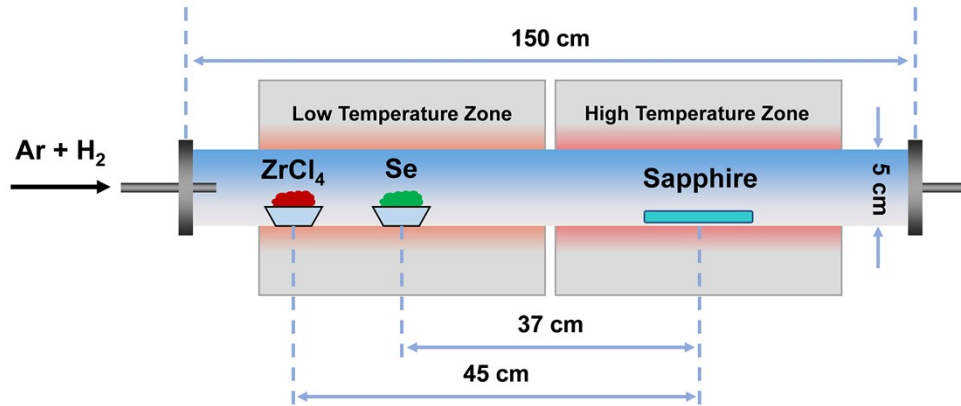

**Figure S1.** Schematic diagram of the CVD system with two independently controlled temperature zones for the epitaxial growth of ZrSe<sub>2</sub> layers. The diameter and length of the quartz tube and 5 cm and 150 cm, respectively. ZrCl<sub>4</sub> powder and sapphire substrates were put in the center of low-temperature (LT) and high-temperature (HT) zones, respectively. The Se and ZrCl<sub>4</sub> powders were typically placed at the upstream 37 cm and 45 cm away from the substrate, respectively.

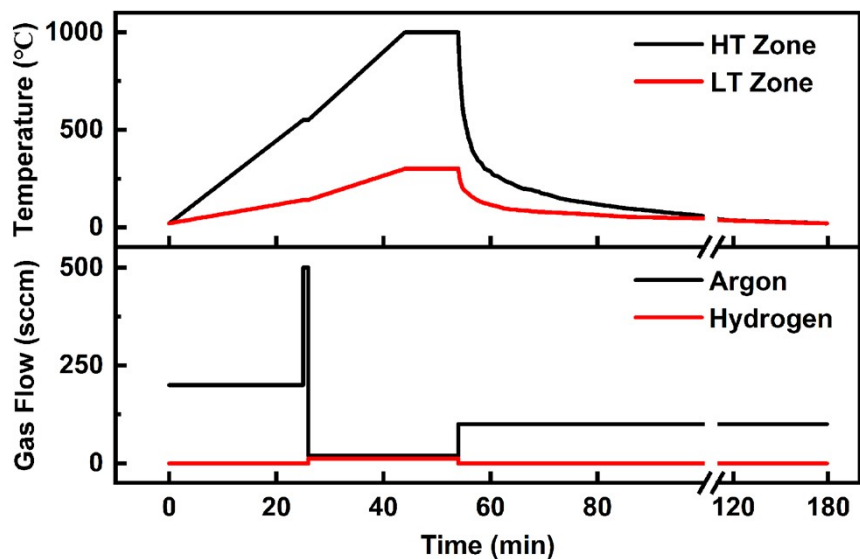

**Figure S2.** The temperature and the gas flow programming process used for a typical growth of  $\text{ZrSe}_2$  layers by CVD. A burst of Ar flow for 2 min at 550 °C occurred to drive away premature excess  $\text{ZrCl}_4$  vapor and prevent the over- or undersupply of Cl and Se.

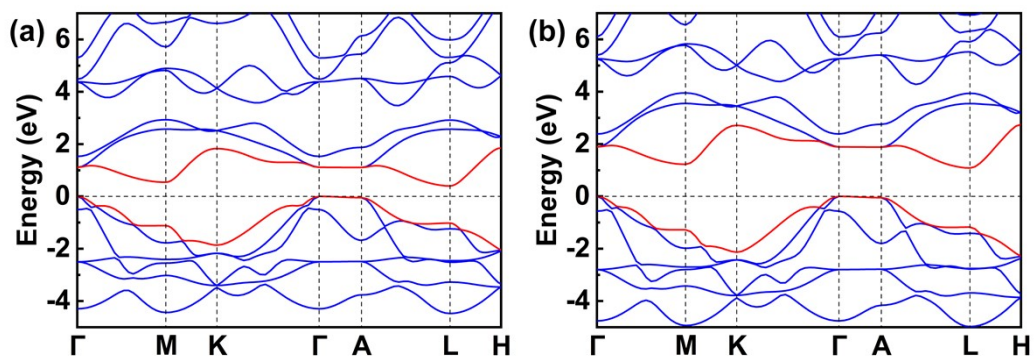

**Figure S3.** Electronic band structures of bulk 1T-ZrSe<sub>2</sub> with the theoretically optimized lattice constants on the relaxed structure ( $a = b = 3.798 \text{ \AA}$ ,  $c = 6.878 \text{ \AA}$ ) under d) PBE and e) HSE06. Red lines indicate the VBM and CBM.

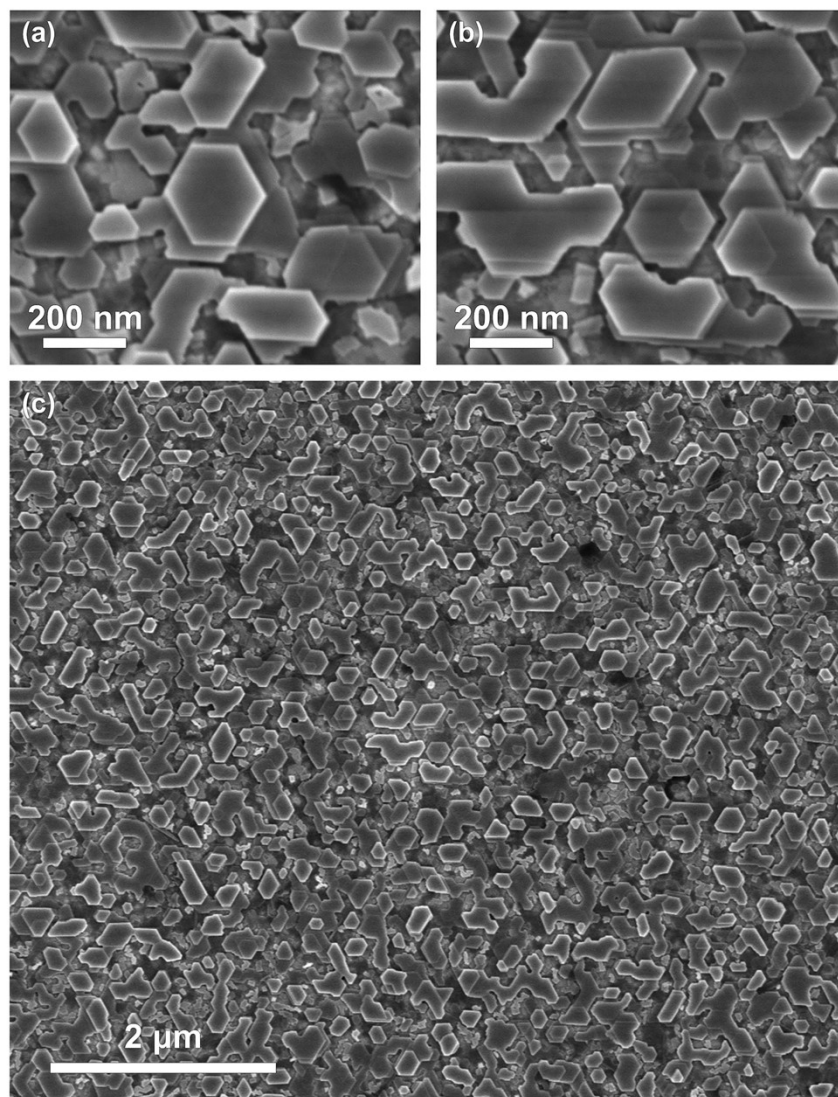

**Figure S4.** Typical SEM images with different magnifications of the CVD-grown ZrSe<sub>2</sub> nanosheets on sapphire substrate.

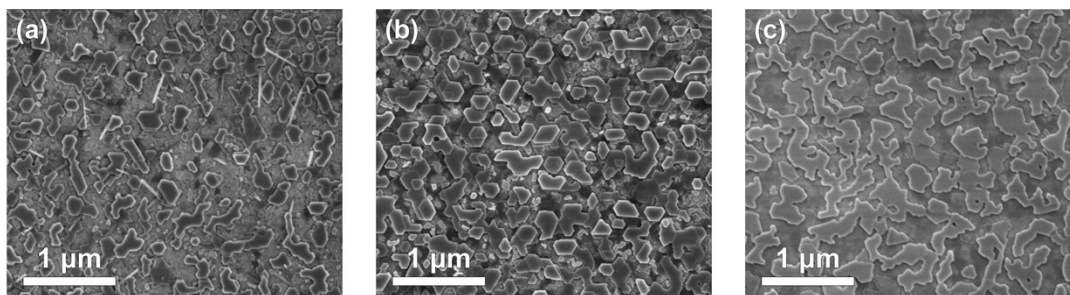

**Figure S5.** The SEM images of the ZrSe<sub>2</sub> nanosheets grown on sapphire substrates at different Se-source temperatures of a) 250, b) 300, c) 350 °C.

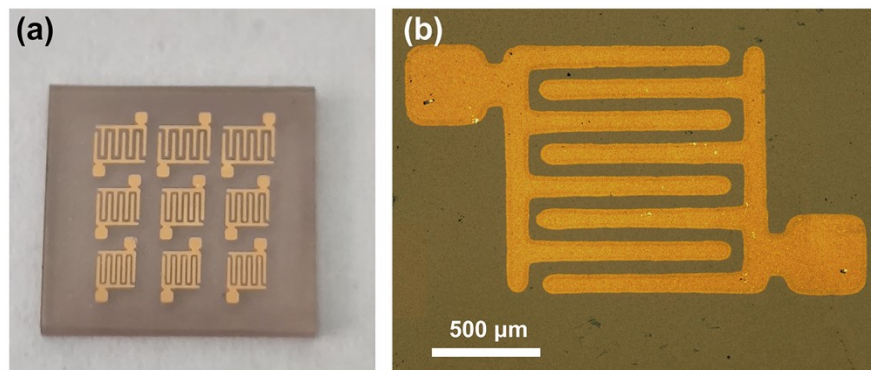

**Figure S6.** a) The photograph and b) optical micrograph of the  $\text{ZrSe}_2$ -based photodetector. The distance between two adjacent Au electrodes is estimated to be  $70\ \mu\text{m}$ .

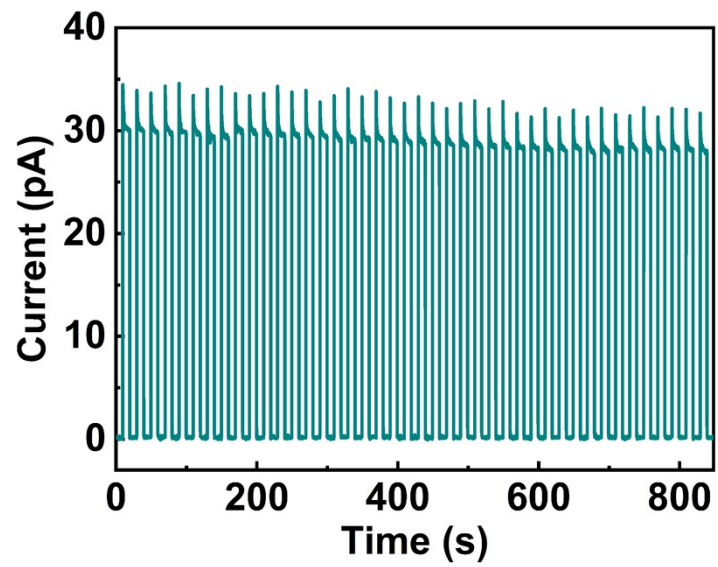

**Figure S7.** Operational stability of the  $\text{ZrSe}_2$  photodetector measured at 10 V for 40 switching cycles.
